# Supplementary material
Source: PubMed Central journal article supplement (PMC6026557)
Supplement: NIHMS961882-supplement-supplement_1.pdf [file NIHMS961882-supplement-supplement_1.pdf]

## Supplementary Materials

**Supplementary Table I***Cross-Rater Phenotypic Correlations for Latent Growth Factors*

| Latent Variables     | Teacher Intercept | Teacher Slope |
|----------------------|-------------------|---------------|
| <b>Internalizing</b> |                   |               |
| Parent Intercept     | .36*              | -.20*         |
| Parent Slope         | .14               | .07           |
| <b>Externalizing</b> |                   |               |
| Parent Intercept     | .41*              | -.18          |
| Parent Slope         | -.06              | .64*          |

*Note.* Partial correlations, controlling for sex. Estimates were taken from two phenotypic bivariate growth models, one for internalizing and the other for externalizing, each of which included both raters.

\* $p < .05$ .

**Supplementary Table II***Cross-Rater Phenotypic Correlations for Growth Factor Scores*

| Factor Scores        | Teacher Intercept | Teacher Slope |
|----------------------|-------------------|---------------|
| <b>Internalizing</b> |                   |               |
| Parent Intercept     | .54*              | -.39*         |
| Parent Slope         | .27*              | -.01          |
| <b>Externalizing</b> |                   |               |
| Parent Intercept     | .48*              | -.07          |
| Parent Slope         | .07               | .79*          |

*Note.* Partial correlations, controlling for sex, of factor scores extracted from the models presented in Supplementary Table I.

\* $p < .05$ .

**Supplementary Table III***Twin Correlations For Growth Factor Scores*

| Factor Scores                   | Teacher<br>twin1   | Parent<br>twin1    | Teacher<br>twin2  | Parent<br>twin2   |
|---------------------------------|--------------------|--------------------|-------------------|-------------------|
| <b>Internalizing Intercepts</b> |                    |                    |                   |                   |
| Teacher twin1                   | 1                  | .54 <sup>*a</sup>  | .28 <sup>*</sup>  | .23 <sup>*c</sup> |
| Parent twin1                    | .54 <sup>*a</sup>  | 1                  | .23 <sup>*c</sup> | .48 <sup>*</sup>  |
| Teacher twin2                   | .65 <sup>*</sup>   | .41 <sup>*b</sup>  | 1                 | .54 <sup>*a</sup> |
| Parent twin2                    | .41 <sup>*b</sup>  | .69 <sup>*</sup>   | .54 <sup>*a</sup> | 1                 |
| <b>Internalizing Slopes</b>     |                    |                    |                   |                   |
| Teacher twin1                   | 1                  | -.01 <sup>a</sup>  | .06               | -.05 <sup>c</sup> |
| Parent twin1                    | -.01 <sup>a</sup>  | 1                  | -.05 <sup>c</sup> | .43 <sup>*</sup>  |
| Teacher twin2                   | .38 <sup>*</sup>   | -.10 <sup>*b</sup> | 1                 | -.01 <sup>a</sup> |
| Parent twin2                    | -.10 <sup>*b</sup> | .49 <sup>*</sup>   | -.01 <sup>a</sup> | 1                 |
| <b>Externalizing Intercepts</b> |                    |                    |                   |                   |
| Teacher twin1                   | 1                  | .48 <sup>*a</sup>  | .41 <sup>*</sup>  | .20 <sup>*c</sup> |
| Parent twin1                    | .48 <sup>*a</sup>  | 1                  | .20 <sup>*c</sup> | .50 <sup>*</sup>  |
| Teacher twin2                   | .70 <sup>*</sup>   | .37 <sup>*b</sup>  | 1                 | .48 <sup>*a</sup> |
| Parent twin2                    | .37 <sup>*b</sup>  | .79 <sup>*</sup>   | .48 <sup>*a</sup> | 1                 |
| <b>Externalizing Slopes</b>     |                    |                    |                   |                   |
| Teacher twin1                   | 1                  | .79 <sup>*a</sup>  | .32 <sup>*</sup>  | .26 <sup>*c</sup> |
| Parent twin1                    | .79 <sup>*a</sup>  | 1                  | .26 <sup>*c</sup> | .38 <sup>*</sup>  |
| Teacher twin2                   | .46 <sup>*</sup>   | .36 <sup>*b</sup>  | 1                 | .79 <sup>*a</sup> |
| Parent twin2                    | .36 <sup>*b</sup>  | .50 <sup>*</sup>   | .79 <sup>*a</sup> | 1                 |

*Note.* Partial correlations, controlling for sex, of factor scores extracted from the models presented in Supplementary Table I (MZ correlations on lower diagonal and DZ correlations on upper diagonal). Correlations obtained from four models, each of which regressed all factor scores on sex. Within each model, within-rater sex effects, intercepts, and residual variances were constrained to equality across twins and zygosity groups; covariances were constrained to equality as noted.

<sup>a</sup>Within-twin cross-rater covariances constrained to be equal across twins and zygosity groups.

<sup>b</sup>MZ cross-twin cross-rater covariances constrained to be equal for twin1 with twin2 and twin2 with twin1.

<sup>c</sup>DZ cross-twin cross-rater covariances constrained to be equal for twin1 with twin2 and twin2 with twin1.

\* $p < .05$ .

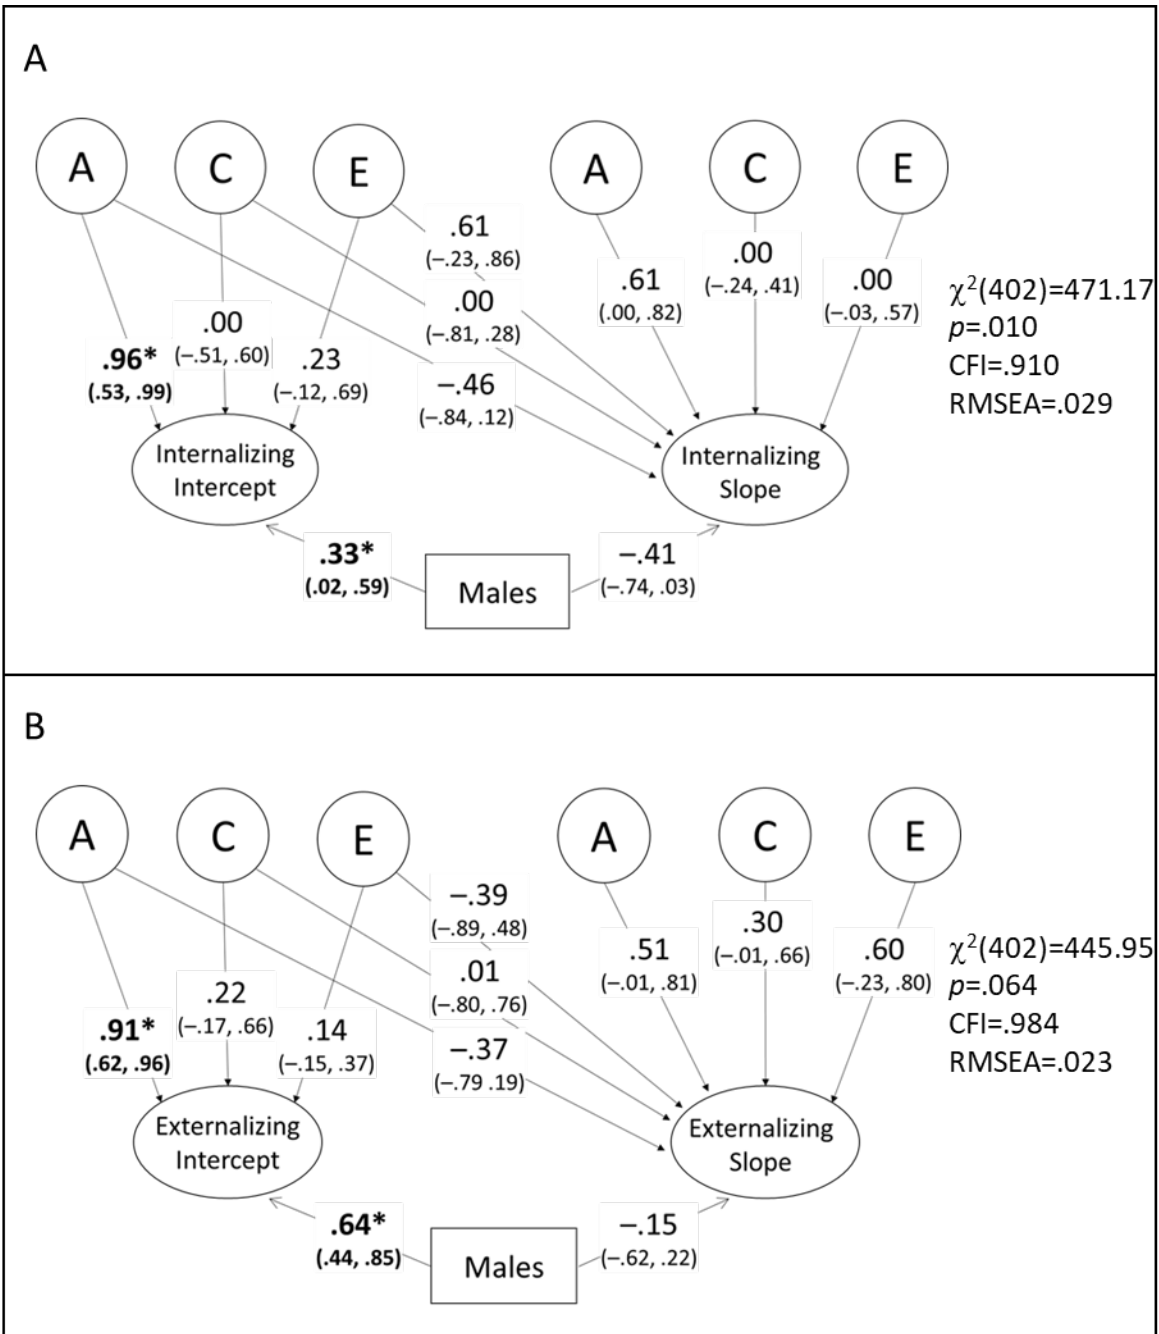

Supplementary Figure 1. Teacher-rating models. Standardized parameter estimates (and bootstrapped 95% confidence intervals) for additive genetic (A), shared environmental (C), and nonshared environmental (E) influences on teacher-rated internalizing (panel A) and externalizing (panel B) behaviors. Fit indices are shown to the right. The standardized regression betas from sex capture the mean difference across sex (males – females). \* $p < .05$ , as indicated by the confidence intervals.

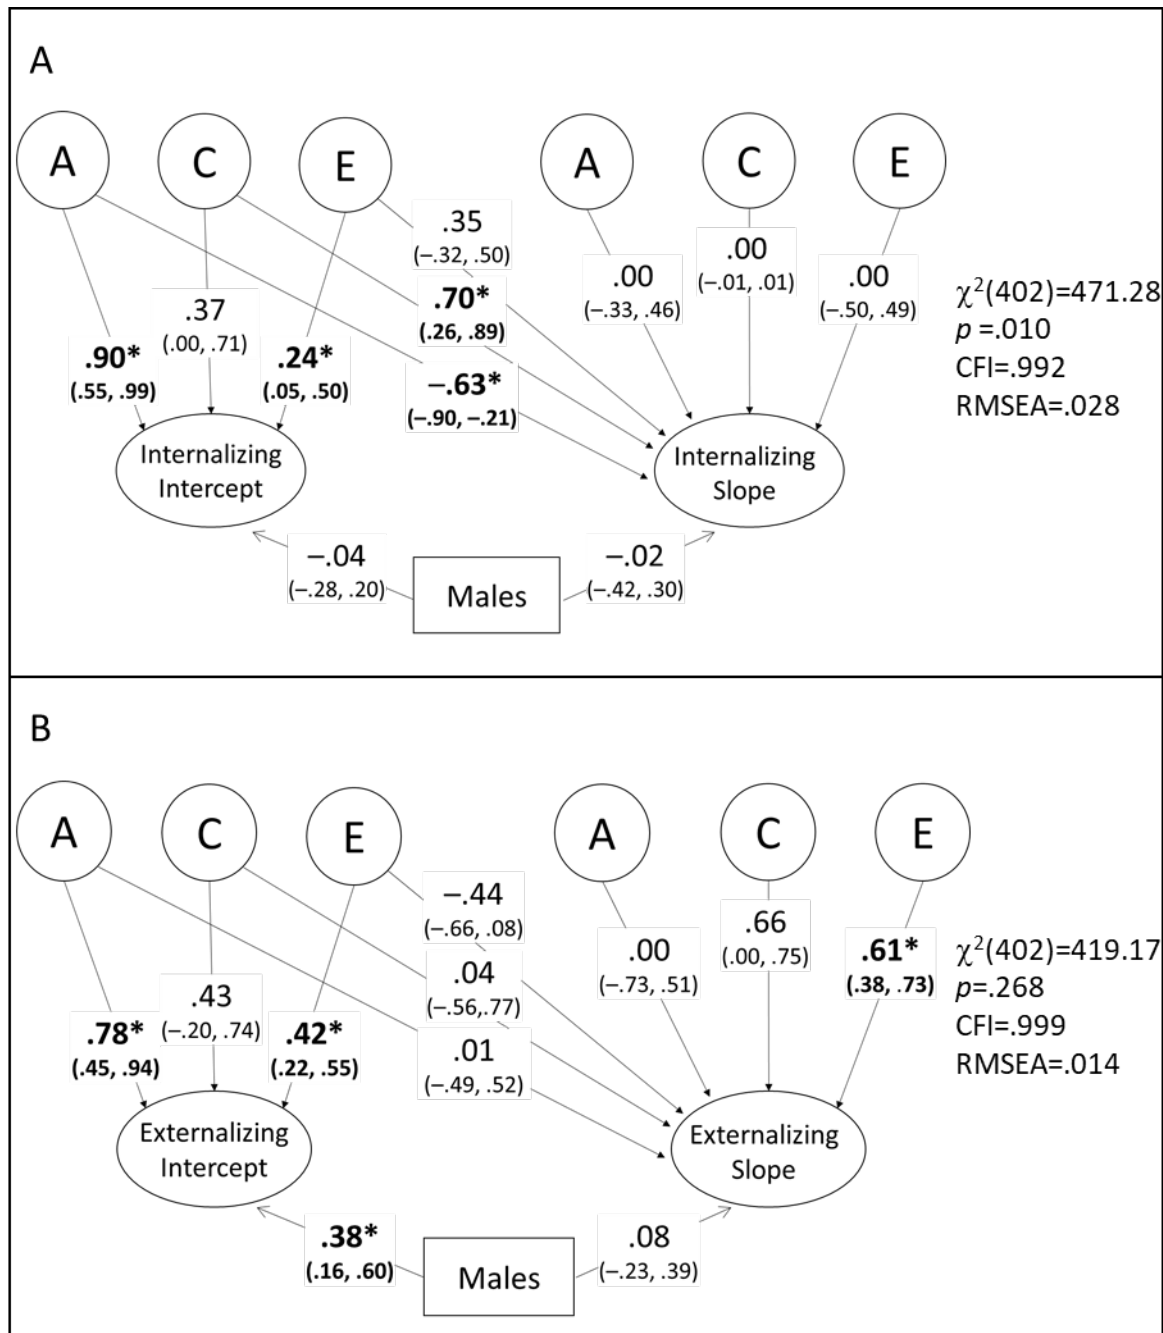

Supplementary Figure 2 Parent-rating models. Standardized parameter estimates (and bootstrapped 95% confidence intervals) for additive genetic (A), shared environmental (C), and nonshared environmental (E) influences on parent-rated internalizing (panel A) and externalizing (panel B) behaviors. Fit indices are shown to the right. The standardized regression betas from sex capture the mean difference across sex (males – females). \* $p < .05$ , as indicated by the confidence intervals.
